# Supplementary material for: The distinctive signature of regulatory CD4 T cells committed in the human thymus
Source: Front Immunol. 2025 Mar 26;16:1553554. doi: 10.3389/fimmu.2025.1553554 (PMC11979120; doi:10.3389/fimmu.2025.1553554)
Supplement: Supplementary file 8 [file Table7.xlsx]

## Sheet: ST7
ensembl_gene_id	hgnc_symbol	name; alias
ENSG00000175899	A2M	alpha-2-macroglobulin
ENSG00000256069	A2MP1	alpha-2-macroglobulin pseudogene 1
ENSG00000163017	ACTG2	actin gamma 2, smooth muscle
ENSG00000077522	ACTN2	actinin alpha 2
ENSG00000144843	ADPRH	ADP-ribosylarginine hydrolase
ENSG00000151632	AKR1C2	aldo-keto reductase family 1 member C2
ENSG00000151631	AKR1C6P	aldo-keto reductase family 1 member C6, pseudogene
ENSG00000164236	ANKRD33B	ankyrin repeat domain 33B
ENSG00000029153	ARNTL2	basic helix-loop-helix ARNT like 2
ENSG00000132681	ATP1A4	ATPase Na+/K+ transporting subunit alpha 4
ENSG00000176597	B3GNT5	UDP-GlcNAc:betaGal beta-1,3-N-acetylglucosaminyltransferase 5
ENSG00000113303	BTNL8	butyrophilin like 8
ENSG00000221843	C2orf16	SPATA31 subfamily H member 1
ENSG00000134508	CABLES1	Cdk5 and Abl enzyme substrate 1
ENSG00000143318	CASQ1	calsequestrin 1
ENSG00000105974	CAV1	caveolin 1
ENSG00000151773	CCDC122	coiled-coil domain containing 122
ENSG00000149201	CCDC81	coiled-coil domain containing 81
ENSG00000102962	CCL22	C-C motif chemokine ligand 22
ENSG00000179934	CCR8	C-C motif chemokine receptor 8
ENSG00000120903	CHRNA2	cholinergic receptor nicotinic alpha 2 subunit
ENSG00000147434	CHRNA6	cholinergic receptor nicotinic alpha 6 subunit
ENSG00000113946	CLDN16	claudin 16
ENSG00000187912	CLEC17A	C-type lectin domain containing 17A
ENSG00000109684	CLNK	cytokine dependent hematopoietic cell linker
ENSG00000158258	CLSTN2	calsyntenin 2
ENSG00000188822	CNR2	cannabinoid receptor 2; PCDHA6, protocadherin alpha 6
ENSG00000109472	CPE	carboxypeptidase E
ENSG00000060566	CREB3L3	cAMP responsive element binding protein 3 like 3
ENSG00000183117	CSMD1	CUB and Sushi multiple domains 1
ENSG00000168329	CX3CR1	C-X3-C motif chemokine receptor 1
ENSG00000172817	CYP7B1	cytochrome P450 family 7 subfamily B member 1
ENSG00000092345	DAZL	deleted in azoospermia like
ENSG00000237517	DGCR5	DiGeorge syndrome critical region gene 5
ENSG00000162595	DIRAS3	DIRAS family GTPase 3
ENSG00000231150	DNAH8-AS1	DNAH8 antisense RNA 1
ENSG00000105246	EBI3	Epstein-Barr virus induced 3
ENSG00000267336	EIF4A2P1	eukaryotic translation initiation factor 4A2 pseudogene 1
ENSG00000120658	ENOX1	ecto-NOX disulfide-thiol exchanger 1
ENSG00000154269	ENPP3	ectonucleotide pyrophosphatase/phosphodiesterase 3
ENSG00000280303	ERICD	E2F1-regulated inhibitor of cell death
ENSG00000164687	FABP5	fatty acid binding protein 5; FABP5P1, fatty acid binding protein 5 pseudogene 1
ENSG00000108950	FAM20A	FAM20A golgi associated secretory pathway pseudokinase
ENSG00000203780	FANK1	fibronectin type III and ankyrin repeat domains 1
ENSG00000165323	FAT3	FAT atypical cadherin 3
ENSG00000068078	FGFR3	fibroblast growth factor receptor 3
ENSG00000119686	FLVCR2	FLVCR choline and putative heme transporter 2
ENSG00000115414	FN1	fibronectin 1
ENSG00000134363	FST	follistatin
ENSG00000109458	GAB1	GRB2 associated binding protein 1; PIGU, phosphatidylinositol glycan anchor biosynthesis class U
ENSG00000144649	GASK1A	golgi associated kinase 1A
ENSG00000164849	GPR146	G protein-coupled receptor 146
ENSG00000143147	GPR161	G protein-coupled receptor 161
ENSG00000124196	GTSF1L	gametocyte specific factor 1 like
ENSG00000162882	HAAO	3-hydroxyanthranilate 3,4-dioxygenase
ENSG00000165996	HACD1	3-hydroxyacyl-CoA dehydratase 1
ENSG00000019991	HGF	hepatocyte growth factor; SOS1, SOS Ras/Rac guanine nucleotide exchange factor 1
ENSG00000164161	HHIP	hedgehog interacting protein
ENSG00000243753	HLA-L	major histocompatibility complex, class I, L (pseudogene)
ENSG00000100292	HMOX1	heme oxygenase 1
ENSG00000228168	HNRNPA1P21	heterogeneous nuclear ribonucleoprotein A1 pseudogene 21
ENSG00000002587	HS3ST1	heparan sulfate-glucosamine 3-sulfotransferase 1
ENSG00000164270	HTR4	5-hydroxytryptamine receptor 4
ENSG00000081985	IL12RB2	interleukin 12 receptor subunit beta 2
ENSG00000115607	IL18RAP	interleukin 18 receptor accessory protein
ENSG00000115594	IL1R1	interleukin 1 receptor type 1
ENSG00000115602	IL1RL1	interleukin 1 receptor like 1
ENSG00000134460	IL2RA	interleukin 2 receptor subunit alpha; CD25
ENSG00000128604	IRF5	interferon regulatory factor 5
ENSG00000105855	ITGB8	integrin subunit beta 8
ENSG00000099840	IZUMO4	IZUMO family member 4
ENSG00000186994	KANK3	KN motif and ankyrin repeat domains 3
ENSG00000184156	KCNQ3	potassium voltage-gated channel subfamily Q member 3
ENSG00000170745	KCNS3	potassium voltage-gated channel modifier subfamily S member 3
ENSG00000256937	KRT17P8	keratin 17 pseudogene 8
ENSG00000179630	LACC1	laccase domain containing 1
ENSG00000196569	LAMA2	laminin subunit alpha 2
ENSG00000119862	LGALSL	galectin like
ENSG00000241163	LINC00877	long intergenic non-protein coding RNA 877
ENSG00000240024	LINC00888	SNHG33, small nucleolar RNA host gene 33
ENSG00000237248	LINC00987	long intergenic non-protein coding RNA 987
ENSG00000225431	LINC01671	long intergenic non-protein coding RNA 1671
ENSG00000254401	LINC02752	long intergenic non-protein coding RNA 2752
ENSG00000204020	LIPN	lipase family member N
ENSG00000175445	LPL	lipoprotein lipase
ENSG00000131409	LRRC4B	leucine rich repeat containing 4B
ENSG00000254087	LYN	LYN proto-oncogene, Src family tyrosine kinase
ENSG00000144893	MED12L	mediator complex subunit 12L
ENSG00000153208	MERTK	MER proto-oncogene, tyrosine kinase
ENSG00000053328	METTL24	methyltransferase like 24
ENSG00000260314	MRC1	mannose receptor C-type 1
ENSG00000185818	NAT8L	N-acetyltransferase 8 like
ENSG00000188158	NHS	NHS actin remodeling regulator
ENSG00000167483	NIBAN3	niban apoptosis regulator 3
ENSG00000183971	NPW	neuropeptide W
ENSG00000099250	NRP1	neuropilin 1
ENSG00000198400	NTRK1	neurotrophic receptor tyrosine kinase 1
ENSG00000183715	OPCML	opioid binding protein/cell adhesion molecule like
ENSG00000115155	OTOF	otoferlin
ENSG00000162881	OXER1	oxoeicosanoid receptor 1
ENSG00000169851	PCDH7	protocadherin 7
ENSG00000067177	PHKA1	phosphorylase kinase regulatory subunit alpha 1
ENSG00000154864	PIEZO2	piezo type mechanosensitive ion channel component 2
ENSG00000102024	PLS3	plastin 3
ENSG00000168081	PNOC	prepronociceptin
ENSG00000139174	PRICKLE1	prickle planar cell polarity protein 1
ENSG00000165186	PTCHD1	patched domain containing 1
ENSG00000073756	PTGS2	prostaglandin-endoperoxide synthase 2
ENSG00000127329	PTPRB	protein tyrosine phosphatase receptor type B
ENSG00000168461	RAB31	RAB31, member RAS oncogene family
ENSG00000058335	RASGRF1	Ras protein specific guanine nucleotide releasing factor 1
ENSG00000189056	RELN	reelin
ENSG00000145428	RNF175	ring finger protein 175
ENSG00000149489	ROM1	retinal outer segment membrane protein 1
ENSG00000185483	ROR1	receptor tyrosine kinase like orphan receptor 1; RARA, RAR related orphan receptor A
ENSG00000196218	RYR1	ryanodine receptor 1
ENSG00000142512	SIGLEC10	sialic acid binding Ig like lectin 10
ENSG00000221955	SLC12A8	solute carrier family 12 member 8
ENSG00000163393	SLC22A15	solute carrier family 22 member 15
ENSG00000164729	SLC35G3	solute carrier family 35 member G3
ENSG00000134955	SLC37A2	solute carrier family 37 member 2
ENSG00000187122	SLIT1	slit guidance ligand 1;SLIT3, slit guidance ligand 3
ENSG00000178235	SLITRK1	SLIT and NTRK like family member 1
ENSG00000196096	SPAG16-DT	SPAG16 divergent transcript
ENSG00000166145	SPINT1	serine peptidase inhibitor, Kunitz type 1
ENSG00000144681	STAC	SH3 and cysteine rich domain
ENSG00000272902	TBC1D8-AS1	TBC1D8 antisense RNA 1
ENSG00000005108	THSD7A	thrombospondin type 1 domain containing 7A
ENSG00000160183	TMPRSS3	transmembrane serine protease 3; TMPRSS4, transmembrane serine protease 4
ENSG00000187045	TMPRSS6	transmembrane serine protease 6
ENSG00000141655	TNFRSF11A	TNF receptor superfamily member 11a
ENSG00000240505	TNFRSF13B	TNF receptor superfamily member 13B
ENSG00000120949	TNFRSF8	TNF receptor superfamily member 8
ENSG00000198113	TOR4A	torsin family 4 member A
ENSG00000106537	TSPAN13	tetraspanin 13
ENSG00000165914	TTC7B	tetratricopeptide repeat domain 7B
ENSG00000152086	TUBA3E	tubulin alpha 3e
ENSG00000215218	UBE2QL1	ubiquitin conjugating enzyme E2 QL1
ENSG00000049247	UTS2	urotensin 2
ENSG00000018408	WWTR1	WW domain containing transcription regulator 1
ENSG00000143184	XCL1	X-C motif chemokine ligand 1
ENSG00000230266	XXYLT1-AS2	XXYLT1 antisense RNA 2
ENSG00000162078	ZG16B	zymogen granule protein 16B
ENSG00000159905	ZNF221	zinc finger protein 221
ENSG00000198185	ZNF334	zinc finger protein 334
ENSG00000232713	-	-
ENSG00000249790	-	-
ENSG00000260101	-	-
ENSG00000237643	-	-
ENSG00000267744	-	-
ENSG00000278607	-	-
ENSG00000260196	-	-
ENSG00000280145	-	-
ENSG00000228173	-	-
ENSG00000250274	-	-
ENSG00000277991	-	-
ENSG00000236846	-	-
ENSG00000233577	-	-
ENSG00000242407	-	-
ENSG00000227719	-	-
ENSG00000237372	-	-
